# Supplementary material for: Using historical cardiac troponins to identify patients at a high risk of myocardial infarction
Source: HighWire-hosted journal article supplement (doi:10.1136/heartjnl-2022-321198), 2022-08-10
Supplement: heartjnl-2022-321198supp001_data_supplement.pdf [file heartjnl-2022-321198supp001_data_supplement.pdf]

## SUPPLEMENTAL MATERIAL

### **Using Historical Cardiac Troponins to Identify Patients at a High Risk of Myocardial Infarction**

Andreas Roos<sup>a,b</sup>, MD, PhD, Gustaf Edgren<sup>b,c</sup>, MD, PhD

<sup>a</sup>Department of Emergency and Reparative Medicine, Karolinska University Hospital, Huddinge, Stockholm, Sweden.

<sup>b</sup>Department of Medicine, Clinical Epidemiology Division, Karolinska Institutet, Solna, Stockholm, Sweden.

<sup>c</sup>Department of Cardiology, Södersjukhuset, Stockholm, Sweden.

**TABLE OF CONTENTS**

|                            |    |
|----------------------------|----|
| Supplemental Table 1.....  | 3  |
| Supplemental Table 2.....  | 4  |
| Supplemental Table 3.....  | 6  |
| Supplemental Table 4.....  | 7  |
| Supplemental Table 5.....  | 9  |
| Supplemental Figure 1..... | 11 |

**Supplemental Table 1.** Combination of historical hs-cTnT concentrations and 0 h hs-cTnT with corresponding relative change and historical-adjusted 0 h hs-cTnT

| <b>Historical hs-cTnT</b><br>(ng/l) | <b>0 hs-cTnT</b><br>(ng/l) | <b>Relative change</b><br>(%) | <b>Historical-adjusted 0 h hs-cTnT</b> |
|-------------------------------------|----------------------------|-------------------------------|----------------------------------------|
| 5                                   | 20                         | 300                           | 60.0                                   |
| 10                                  | 25                         | 150                           | 37.5                                   |
| 15                                  | 30                         | 100                           | 30.0                                   |
| 20                                  | 35                         | 75                            | 26.3                                   |
| 25                                  | 40                         | 60                            | 24.0                                   |
| 30                                  | 45                         | 50                            | 22.5                                   |
| 35                                  | 50                         | 43                            | 21.4                                   |
| 40                                  | 55                         | 38                            | 20.6                                   |
| 45                                  | 60                         | 33                            | 20.0                                   |
| 50                                  | 65                         | 30                            | 19.5                                   |
| 55                                  | 70                         | 27                            | 19.1                                   |
| 60                                  | 75                         | 25                            | 18.8                                   |
| 65                                  | 80                         | 23                            | 18.5                                   |
| 70                                  | 85                         | 21                            | 18.2                                   |
| 75                                  | 90                         | 20                            | 18.0                                   |
| 80                                  | 95                         | 19                            | 17.8                                   |
| 85                                  | 100                        | 18                            | 17.6                                   |
| 90                                  | 105                        | 17                            | 17.5                                   |
| 95                                  | 110                        | 16                            | 17.4                                   |
| 100                                 | 115                        | 15                            | 17.3                                   |

Abbreviations: hs-cTnT: high-sensitivity cardiac troponin T.

**Supplemental Table 2.** Baseline characteristics according to tertiles of historical hs-cTnT-adjusted admission hs-cTnT

|                                                                                  | Historical hs-cTnT-adjusted admission hs-cTnT |                      |                 |
|----------------------------------------------------------------------------------|-----------------------------------------------|----------------------|-----------------|
|                                                                                  | Lowest tertile                                | Intermediate tertile | Highest tertile |
| Number of visits                                                                 | 9132 (33)                                     | 9226 (33)            | 9451 (34)       |
| Age (years), median (IQR)                                                        | 68 (56-78)                                    | 72 (61-81)           | 76 (65-84)      |
| Women                                                                            | 4087 (45)                                     | 4063 (44)            | 3922 (42)       |
| <b>Comorbidities</b>                                                             |                                               |                      |                 |
| Prior MI                                                                         | 2166 (24)                                     | 2412 (26)            | 3046 (32)       |
| Prior revascularization                                                          | 2406 (26)                                     | 2556 (28)            | 2816 (30)       |
| Prior stroke                                                                     | 917 (10)                                      | 1112 (12)            | 1412 (15)       |
| Heart failure                                                                    | 2297 (25)                                     | 2915 (32)            | 3713 (39)       |
| Diabetes                                                                         | 2026 (22)                                     | 6793 (26)            | 2838 (30)       |
| Hypertension                                                                     | 5570 (61)                                     | 6305 (68)            | 6838 (72)       |
| Atrial fibrillation                                                              | 2422 (27)                                     | 3057 (33)            | 3347 (35)       |
| Dialysis                                                                         | 60 (0.7)                                      | 75 (0.8)             | 263 (2.8)       |
| COPD                                                                             | 1180 (13)                                     | 1451 (16)            | 1590 (17)       |
| <b>Laboratory data</b>                                                           |                                               |                      |                 |
| First hs-cTnT concentration (ng/l), median (IQR)                                 | 9 (6-15)                                      | 13 (9-17)            | 25 (20-71)      |
| Historical hs-cTnT concentration, (ng/l), median (IQR)                           | 8 (4.9-13)                                    | 9 (5.4-17)           | 14 (7-29)       |
| Relative change between historical and first hs-cTnT concentration, median (IQR) | 11% (5-18)                                    | 33% (23-48)          | 108% (60-217)   |
| Hemoglobin (g/l), median (IQR)                                                   | 137 (127-148)                                 | 136 (124-147)        | 131 (118-143)   |
| Nt-pro-BNP (ng/l), median (IQR)                                                  | 519 (141-1730)                                | 884 (268-2810)       | 2098 (624-5770) |
| eGFR (ml/min/1.73 m <sup>2</sup> ):                                              |                                               |                      |                 |
| >60                                                                              | 7159 (78)                                     | 6357 (69)            | 5105 (54)       |
| 30-59                                                                            | 1766 (19)                                     | 2507 (27)            | 3184 (34)       |
| <30                                                                              | 207 (2.3)                                     | 362 (3.9)            | 1162 (12)       |
| <b>Medications</b>                                                               |                                               |                      |                 |
| Aspirin                                                                          | 3534 (39)                                     | 3944 (43)            | 4403 (47)       |

|                         |           |           |           |
|-------------------------|-----------|-----------|-----------|
| P2Y12 inhibitors*       | 1070 (12) | 1039 (11) | 1201 (13) |
| Any platelet inhibitor† | 3940 (43) | 4389 (48) | 4909 (52) |
| Beta-blockers           | 4855 (53) | 5415 (59) | 5807 (61) |
| ACEi/ARB                | 4325 (47) | 4800 (52) | 5091 (54) |
| Statins                 | 3754 (41) | 4012 (43) | 4133 (44) |
| OAC‡                    | 1531 (17) | 1890 (20) | 7595 (20) |
| Warfarin                | 1207 (13) | 1564 (17) | 1507 (16) |
| DOAC                    | 358 (3.9) | 360 (3.9) | 376 (4.0) |

Data are presented as n (%), or median with IQR. \*Includes treatment with Clopidogrel, Tikagrelor, Dipyridamol or Prasugel. †Includes treatment with Aspirin or P2Y12 inhibitors. ‡Includes treatment with DOAC or Warfarin. Abbreviations: ACEi/ARB: angiotensin-converting enzyme inhibitor/angiotensin receptor blocker; COPD: chronic obstructive pulmonary disease; hs-cTnT: high-sensitivity cardiac troponin T; eGFR: estimated glomerular filtration rate; MI: myocardial infarction; DOAC: direct oral anticoagulants; Nt-pro-BNP: N-terminal pro b-type natriuretic peptide; OAC: oral anticoagulants.

**Supplemental Table 3.** The most common discharge diagnoses according to tertiles of historical-adjusted 0 h hs-cTnT

|                            | <b>Historical-adjusted 0 h hs-cTnT</b>                        |                                                               |                                           |
|----------------------------|---------------------------------------------------------------|---------------------------------------------------------------|-------------------------------------------|
|                            | <b>Lowest tertile</b>                                         | <b>Intermediate tertile</b>                                   | <b>Highest tertile</b>                    |
| <b>Discharge diagnoses</b> |                                                               |                                                               |                                           |
| #1 Diagnosis               | Symptom diagnoses (R00-R09),<br>4147 (51)                     | Symptom diagnoses (R00-R09),<br>3712 (45)                     | Symptom diagnoses (R00-R09),<br>2314 (27) |
| #2 Diagnosis               | AP (I20.9), 380 (4.7)                                         | AP (I20.9), 431 (5.2)                                         | MI (I21, I22), 1510 (18)                  |
| #3 Diagnosis               | Unspecified pain, (M79), 302 (3.7)                            | HF, (I50), 361 (4.3)                                          | AF (I48), 525 (6.2)                       |
| #4 Diagnosis               | General symptoms and signs of<br>illness (R50-R69), 247 (3.0) | Unspecified pain, (M79), 273 (3.3)                            | HF (I50), 525 (6.2)                       |
| #5 Diagnosis               | Abdominal symptoms (R10-19), 232<br>(2.9)                     | General symptoms and signs of<br>illness (R50-R69), 208 (2.5) | AP (I20.9), 382 (4.5)                     |

Note: data are presented as proportions of patients among visits for which there was a final diagnosis available. Missing data within each tertile: 983 (11) (lowest), 916 (9.9) (intermediate), and 970 (10) (highest). Abbreviations: AP: angina pectoris; HF: heart failure; hs-cTnT: high-sensitivity cardiac troponin T; MI: myocardial infarction.

**Supplemental Table 4.** Patient characteristics in visits with a negative or 0  $\Delta$  hs-cTnT

|                                                                                  | Visits with negative $\Delta$ hs-cTnT >20% |                   | Visits with negative $\Delta$ hs-cTnT of 0 to 20%§ |                   |
|----------------------------------------------------------------------------------|--------------------------------------------|-------------------|----------------------------------------------------|-------------------|
|                                                                                  | Visits with MI                             | Visits without MI | Visits with MI                                     | Visits without MI |
| Number of visits                                                                 | 1350 (8.2)                                 | 15,191 (92)       | 404 (1.3)                                          | 31,154 (99)       |
| Age (years), median (IQR)                                                        | 75 (65-85)                                 | 69 (56-79)        | 74 (64-84)                                         | 57 (44-70)        |
| Women                                                                            | 780 (58)                                   | 8578 (56)         | 251 (62)                                           | 15,003 (48)       |
| <b>Comorbidities</b>                                                             |                                            |                   |                                                    |                   |
| Prior MI                                                                         | 1172 (87)                                  | 6410 (42)         | 276 (68)                                           | 5059 (16)         |
| Prior revascularization                                                          | 758 (56)                                   | 5822 (38)         | 209 (52)                                           | 5555 (18)         |
| Prior stroke                                                                     | 200 (15)                                   | 1604 (11)         | 78 (19)                                            | 1971 (6.3)        |
| Heart failure                                                                    | 544 (40)                                   | 4752 (31)         | 173 (43)                                           | 5183 (17)         |
| Diabetes                                                                         | 505 (37)                                   | 3644 (24)         | 153 (38)                                           | 4810 (15)         |
| Hypertension                                                                     | 1062 (79)                                  | 9865 (65)         | 320 (79)                                           | 13,078 (42)       |
| Atrial fibrillation                                                              | 407 (30)                                   | 4769 (31)         | 122 (30)                                           | 5760 (18)         |
| Dialysis                                                                         | 43 (3.2)                                   | 232 (1.5)         | 12 (3.0)                                           | 185 (0.6)         |
| COPD                                                                             | 145 (11)                                   | 1993 (13)         | 70 (17)                                            | 2700 (8.7)        |
| <b>Laboratory data</b>                                                           |                                            |                   |                                                    |                   |
| First hs-cTnT concentration (ng/l), median (IQR)                                 | 31 (16-64)                                 | 10 (6-18)         | 22 (11-41)                                         | 4.9 (4.9-9)       |
| Historical hs-cTnT concentration, (ng/l), median (IQR)                           | 172 (58-570)                               | 26 (12-85)        | 24 (12-46)                                         | 4.9 (4.9-10)      |
| Relative change between historical and first hs-cTnT concentration, median (IQR) | -76 (-92, -48)                             | -46 (-79, -30)    | -8 (-14, -2)                                       | 0 (-7.5, 0)       |
| Hemoglobin (g/l), median (IQR)                                                   | 129 (116-141)                              | 135 (123-146)     | 130 (119-142)                                      | 137 (127-148)     |
| Nt-pro-BNP (ng/l), median (IQR)                                                  | 2580 (831-6670)                            | 891 (248-2859)    | 1075 (247-3620)                                    | 369 (91-1520)     |
| eGFR (ml/min/1.73 m <sup>2</sup> ):                                              |                                            |                   |                                                    |                   |
| >60                                                                              | 712 (53)                                   | 11,322 (75)       | 234 (58)                                           | 27,224 (87)       |
| 30-59                                                                            | 468 (35)                                   | 3242 (21)         | 120 (30)                                           | 3360 (11)         |
| <30                                                                              | 170 (13)                                   | 627 (4.1)         | 50 (12)                                            | 570 (1.8)         |

**Medications**

|                         |          |           |          |             |
|-------------------------|----------|-----------|----------|-------------|
| Aspirin                 | 857 (63) | 7001 (46) | 257 (64) | 8418 (27)   |
| P2Y12 inhibitors*       | 403 (30) | 2925 (19) | 102 (25) | 2552 (8.2)  |
| Any platelet inhibitor† | 924 (68) | 7749 (51) | 276 (68) | 9350 (30)   |
| Beta-blockers           | 944 (70) | 9419 (62) | 287 (71) | 12,009 (39) |
| ACEi/ARB                | 832 (62) | 8217 (54) | 257 (64) | 10,132 (33) |
| Statins                 | 756 (56) | 7036 (46) | 234 (58) | 8793 (28)   |
| OAC‡                    | 167 (12) | 2763 (18) | 59 (15)  | 3514 (11)   |
| Warfarin                | 135 (10) | 2155 (14) | 48 (12)  | 2792 (9.0)  |
| DOAC                    | 38 (2.8) | 669 (4.4) | 12 (3.0) | 814 (2.6)   |

**Mortality within 30 days**

|                              |          |           |          |           |
|------------------------------|----------|-----------|----------|-----------|
| All-cause mortality          | 78 (5.8) | 179 (1.2) | 24 (5.9) | 137 (0.4) |
| Cardiovascular mortality     | 64 (4.7) | 95 (0.6)  | 18 (4.5) | 56 (0.2)  |
| Non-cardiovascular mortality | 14 (1.0) | 84 (0.6)  | 6 (1.5)  | 81 (0.3)  |

Data are presented as n (%), or median with IQR. \*Includes treatment with Clopidogrel, Tikagrelor, Dipyridamol or Prasugel. †Includes treatment with Aspirin or P2Y12 inhibitors. ‡Includes treatment with DOAC or Warfarin. §The interval of 0 to 20% was chosen as only a small proportion of patients had an exact  $\Delta$ hs-cTnT of zero.

Abbreviations: ACEi/ARB: angiotensin-converting enzyme inhibitor/angiotensin receptor blocker; COPD: chronic obstructive pulmonary disease; hs-cTnT: high-sensitivity cardiac troponin T; eGFR: estimated glomerular filtration rate; MI: myocardial infarction; DOAC: direct oral anticoagulants; Nt-pro-BNP: N-terminal pro b-type natriuretic peptide; OAC: oral anticoagulants.



**Supplemental Table 5.** Quantile regression predictors of historical high-sensitivity cardiac troponin T concentrations and  $\Delta$  high-sensitivity cardiac troponin T

|                                        | Historical hs-cTnT                                                             |                  | $\Delta$ hs-cTnT                                                                      |                |
|----------------------------------------|--------------------------------------------------------------------------------|------------------|---------------------------------------------------------------------------------------|----------------|
|                                        | Unadjusted model<br><i>Parameter estimate of median hs-cTnT, ng/l (95% CI)</i> | Adjusted model   | Unadjusted model<br><i>Parameter estimate of <math>\Delta</math> hs-cTnT (95% CI)</i> | Adjusted model |
| <b>Age (years)</b>                     |                                                                                |                  |                                                                                       |                |
| >84                                    | 19.9 (19.2-20.6)                                                               | 13.6 (13.3-14.0) | 34% (32-36)                                                                           | 38% (35-40)    |
| 64-75                                  | 13.0 (12.9-13.0)                                                               | 9.4 (9.1-9.6)    | 33% (33-34)                                                                           | 36% (34-37)    |
| 76-84                                  | 9.0 (9.0-9.0)                                                                  | 7.0 (6.8-7.1)    | 33% (33-34)                                                                           | 36% (35-38)    |
| <64                                    | 5.9 (5.7-6.1)                                                                  | 5.3 (5.2-5.5)    | 30% (28-32)                                                                           | 33% (31-34)    |
| <b>Sex</b>                             |                                                                                |                  |                                                                                       |                |
| Men                                    | 10.0 (10.0-10.0)                                                               | 13.6 (13.3-14.0) | 33% (33-34)                                                                           | 38% (35-40)    |
| Women                                  | 9.5 (9.1-9.8)                                                                  | 11.6 (11.3-11.9) | 33% (33-34)                                                                           | 36% (34-38)    |
| <b>eGFR (mL/min/1.73m<sup>2</sup>)</b> |                                                                                |                  |                                                                                       |                |
| $\geq 60$                              | 7.3 (7.0-7.6)                                                                  | 13.6 (13.3-14.0) | 32% (31-34)                                                                           | 38% (35-40)    |
| 30-60                                  | 16.0 (15.6-16.4)                                                               | 17.3 (17.0-17.6) | 33% (33-34)                                                                           | 41% (38-43)    |
| <30                                    | 34.1 (32.9-35.3)                                                               | 34.2 (33.0-35.4) | 43% (41-46)                                                                           | 51% (48-55)    |
| <b>Prior MI</b>                        |                                                                                |                  |                                                                                       |                |
| No                                     | 9.0 (8.7-9.2)                                                                  | 13.6 (13.3-14.0) | 33% (32-33)                                                                           | 38% (35-40)    |
| Yes                                    | 14.0 (13.6-14.4)                                                               | 15.3 (15.0-15.6) | 32% (30-33)                                                                           | 36% (34-38)    |
| <b>Prior heart failure</b>             |                                                                                |                  |                                                                                       |                |
| No                                     | 8.0 (7.9-8.1)                                                                  | 13.6 (13.3-13.9) | 33% (33-34)                                                                           | 38% (36-40)    |
| Yes                                    | 18.0 (17.7-18.3)                                                               | 17.4 (17.0-17.7) | 30% (29-31)                                                                           | 33% (31-35)    |
| <b>Prior atrial fibrillation</b>       |                                                                                |                  |                                                                                       |                |
| No                                     | 8.0 (8.0-8.0)                                                                  | 13.6 (13.3-13.9) | 33% (33-34)                                                                           | 38% (35-40)    |
| Yes                                    | 14.3 (13.7-15.0)                                                               | 14.7 (14.4-15.0) | 30% (29-31)                                                                           | 33% (31-36)    |

**Prior stroke**

|     |                  |                  |             |             |
|-----|------------------|------------------|-------------|-------------|
| No  | 9.0 (8.8-9.2)    | 13.6 (13.3-13.9) | 33% (33-34) | 38% (36-40) |
| Yes | 14.6 (13.9-15.3) | 14.5 (14.0-14.9) | 33% (32-35) | 38% (36-41) |

**Prior diabetes**

|     |                  |                  |             |             |
|-----|------------------|------------------|-------------|-------------|
| No  | 9.0 (8.9-9.1)    | 13.6 (13.3-13.9) | 33% (33-34) | 38% (35-40) |
| Yes | 14.0 (13.4-14.6) | 15.5 (15.1-15.9) | 33% (32-34) | 37% (35-40) |

**Prior COPD**

|     |                  |                  |             |             |
|-----|------------------|------------------|-------------|-------------|
| No  | 9.0 (9.0-9.1)    | 13.6 (13.3-13.9) | 33% (33-34) | 38% (36-40) |
| Yes | 14.0 (13.3-14.7) | 15.3 (14.9-15.6) | 32% (30-34) | 38% (35-40) |

---

Abbreviations: COPD: chronic obstructive pulmonary disease; MI: myocardial infarction; hs-cTnT: high-sensitivity cardiac troponin T; eGFR: estimated glomerular filtration rate.

**Supplemental Figure 1.** Diagnostic performance of historical-adjusted hs-cTnT for diagnosing myocardial infarction in patients with a second hs-cTnT measurement at the ED visit.

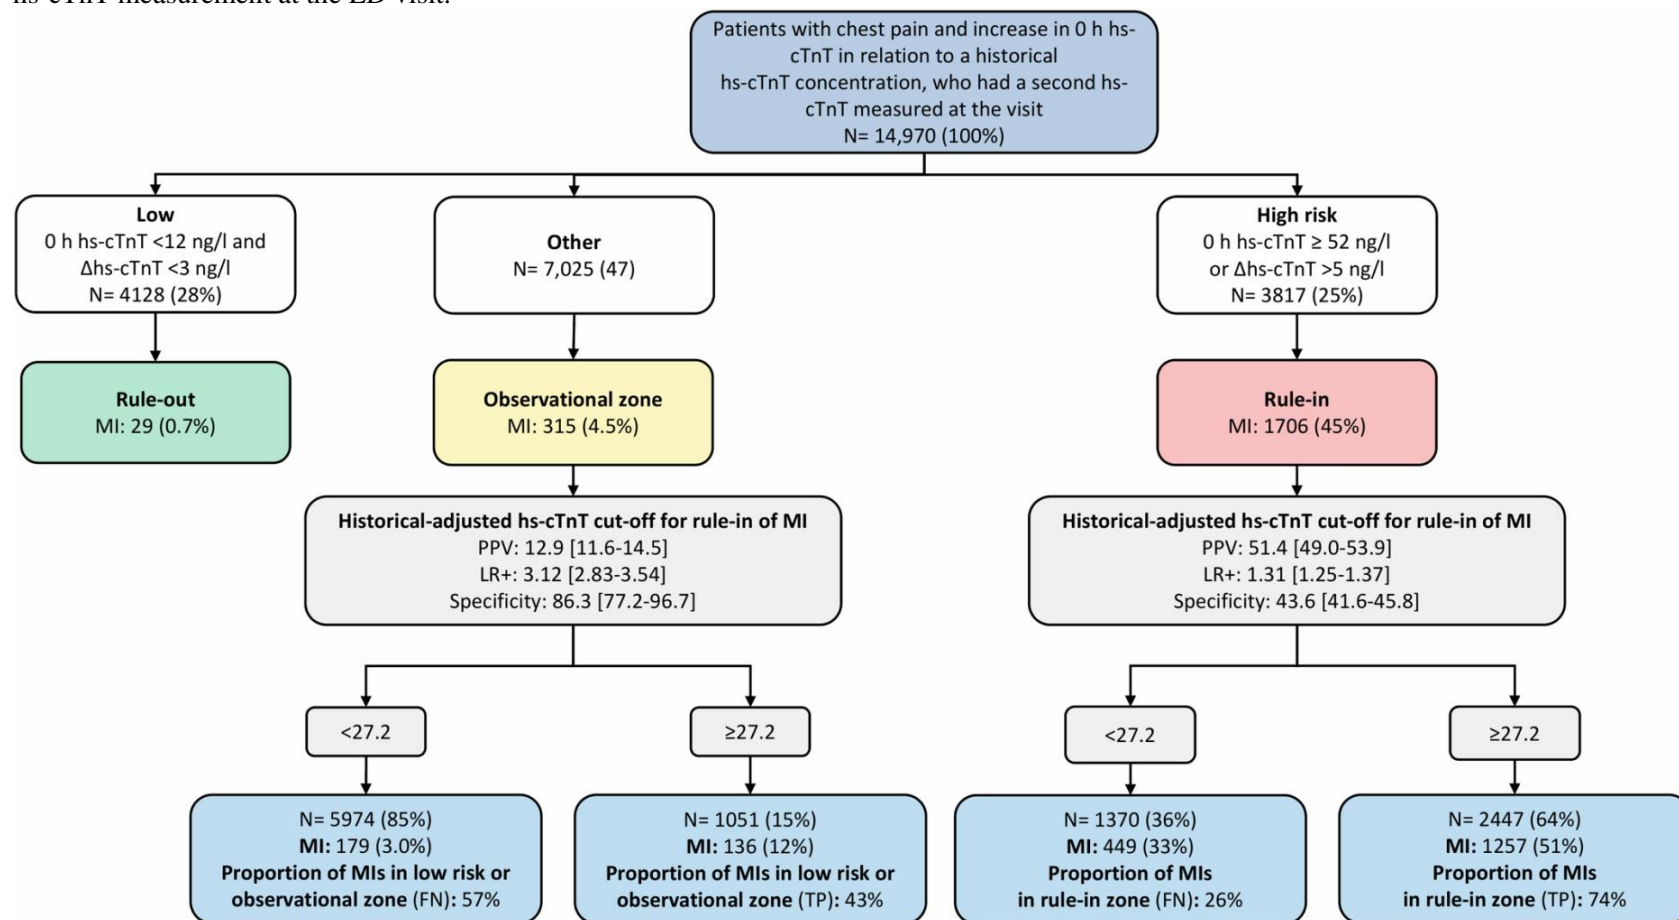

Note: No patients had a very low risk according to the 0 h hs-cTnT (i.e. a 0 h hs-cTnT <5 ng/l), as only patients with a positive historical  $\Delta$ hs-cTnT were included. The  $\Delta$ hs-cTnT concentration in the figure refers to the hs-cTnT change between the 0 h hs-cTnT and the second hs-cTnT measurement. Abbreviations: FN: false negative; Hs-cTnT: high-sensitivity cardiac troponin T; MI: myocardial infarction; LR+: positive likelihood ratio, PPV: positive predictive value; TP: true positive.
